# Supplementary material
Source: PubMed Central journal article supplement (PMC4397107)
Supplement: NIHMS634694-supplement-7.pdf [file NIHMS634694-supplement-7.pdf]

| Gene Name | Fold over- |          | A375Br   | Definition                                                      |
|-----------|------------|----------|----------|-----------------------------------------------------------------|
|           | A375BR     | A375P    |          |                                                                 |
| IGFBP5    | 13.57862   | 8.75745  | 28.26945 | Insulin-like growth factor binding protein 5                    |
| ABLIM1    | 12.43349   | 7.81977  | 24.48330 | Actin binding LIM protein 1                                     |
| HPDL      | 13.33408   | 9.91512  | 10.69574 | 4-hydroxyphenylpyruvate dioxygenase-like                        |
| TNFSF13B  | 11.38132   | 7.97647  | 10.59159 | Tumor necrosis factor superfamily, member 13b                   |
| CYP2J2    | 11.93502   | 8.89068  | 8.24969  | Cytochrome P450, family 2, subfamily J, polypeptide 2           |
| LIMCH1    | 12.04037   | 9.00768  | 8.18334  | LIM and calponin homology domains 1                             |
| SUSD1     | 10.86500   | 7.86592  | 7.99490  | Sushi domain containing 1                                       |
| MFI2      | 10.13690   | 7.22251  | 7.53907  | Antigen p97 (melanoma associated)                               |
| C1orf59   | 11.90157   | 9.00162  | 7.46401  | Chromosome 1 open reading frame 59                              |
| C3        | 12.43153   | 9.65024  | 6.87469  | Complement component 3                                          |
| ACOT11    | 10.55802   | 7.78136  | 6.85261  | Acyl-CoA thioesterase 11                                        |
| ABCA1     | 11.62815   | 8.87194  | 6.75619  | ATP-binding cassette, sub-family A (ABC1), member 1             |
| GPX3      | 12.37877   | 9.64890  | 6.63394  | Glutathione peroxidase 3                                        |
| SNX22     | 10.03958   | 7.40746  | 6.19935  | Sorting nexin 22                                                |
| IFIT1     | 11.79999   | 9.17001  | 6.19017  | Interferon-induced protein with tetratricopeptide repeats 1     |
| SDC3      | 12.93029   | 10.32844 | 6.07064  | Syndecan 3                                                      |
| SLIT2     | 10.12112   | 7.54806  | 5.95070  | Slit homolog 2                                                  |
| TCF4      | 10.45115   | 7.89283  | 5.89019  | Transcription factor 4                                          |
| LDB2      | 10.81448   | 8.31735  | 5.64559  | LIM domain binding 2                                            |
| SNAP25    | 11.13016   | 8.64440  | 5.60132  | Synaptosomal-associated protein                                 |
| QPRT      | 11.02834   | 8.66629  | 5.14102  | Quinolate phosphoribosyltransferase                             |
| XKR8      | 9.65892    | 7.29777  | 5.13780  | XK, Kell blood group complex subunit-related family, member 8   |
| HSD17B1   | 11.67443   | 9.33671  | 5.05503  | Hydroxysteroid (17-beta) dehydrogenase 1                        |
| SLC16A3   | 11.91604   | 9.62009  | 4.91076  | Solute carrier family 16, member 3                              |
| EFEMP1    | 9.94799    | 7.65531  | 4.89962  | EGF-containing fibulin-like extracellular matrix protein 1      |
| IFITM1    | 10.82167   | 8.55577  | 4.80954  | Interferon induced transmembrane protein 1                      |
| MOXD1     | 13.71038   | 11.49386 | 4.64769  | Monoxygenase, DBH-like 1                                        |
| PDE4B     | 12.21677   | 10.01528 | 4.59957  | Phosphodiesterase 4B                                            |
| PLOD2     | 13.11982   | 10.93257 | 4.55436  | Procollagen-lysine, 2-oxoglutarate 5-dioxygenase 2              |
| ALDH2     | 9.60608    | 7.46583  | 4.40840  | Aldehyde dehydrogenase 2 family (mitochondrial)                 |
| PDE5A     | 9.81107    | 7.68553  | 4.36368  | Phosphodiesterase 5A, cGMP-specific                             |
| SPP1      | 12.79447   | 10.68612 | 4.31199  | Secreted phosphoprotein 1                                       |
| CTLA4     | 11.00020   | 8.91121  | 4.25451  | Cytotoxic T-lymphocyte-associated protein 4                     |
| LINGO2    | 9.38340    | 7.36990  | 4.03759  | Leucine rich repeat and Ig domain containing 2                  |
| SLITRK2   | 9.75980    | 7.81177  | 3.85846  | SLIT and NTRK-like family, member 2                             |
| STARD13   | 10.88995   | 8.94299  | 3.85563  | StAR-related lipid transfer (START) domain containing 13        |
| ALS2CR11  | 10.75827   | 8.82627  | 3.81584  | Amyotrophic lateral sclerosis 2 chromosome region, candidate 11 |
| C20orf55  | 11.14957   | 9.23000  | 3.78310  | Chromosome 20 open reading frame 55                             |
| PLEKHA5   | 11.44940   | 9.53442  | 3.77107  | Pleckstrin homology domain containing, family A member 5        |
| MYL9      | 9.16451    | 7.26037  | 3.74286  | Myosin, light chain 9, regulatory                               |
| RAMP2     | 9.24235    | 7.34308  | 3.73025  | Receptor activity modifying protein 2                           |
| COL5A3    | 10.67089   | 8.77299  | 3.72671  | Collagen, type V, alpha 3                                       |
| CAND2     | 9.83905    | 7.94553  | 3.71542  | Cullin-associated and neddylation-dissociated 2                 |
| BCAT1     | 11.99563   | 10.10358 | 3.71161  | Branched chain aminotransferase 1                               |
| SNORD56   | 11.34948   | 9.47245  | 3.67317  | Small nucleolar RNA, C/D box 56                                 |
| MXRA7     | 12.04864   | 10.19163 | 3.62255  | Matrix-remodelling associated 7                                 |
| CPVL      | 13.41025   | 11.56878 | 3.58373  | Carboxypeptidase, vitellogenic-like                             |
| TUBB2B    | 12.24439   | 10.42529 | 3.52861  | Tubulin, beta 2B                                                |
| CPE       | 13.79880   | 11.98755 | 3.50946  | Carboxypeptidase E                                              |
| DTNA      | 12.49801   | 10.70179 | 3.47308  | Dystrobrevin, alpha                                             |
| TM4SF19   | 9.93401    | 8.14091  | 3.46557  | Transmembrane 4 L six family member 19, transcript variant 2    |
| ZNF589    | 12.37528   | 10.59970 | 3.42376  | Zinc finger protein 589                                         |
| CNNM1     | 9.56477    | 7.81335  | 3.36689  | Cyclin M1                                                       |
| COL1A2    | 10.08649   | 8.34503  | 3.34374  | Collagen, type I, alpha 2                                       |
| COLEC11   | 9.49167    | 7.76065  | 3.31964  | Collectin sub-family member 11                                  |
| SLC24A5   | 8.93724    | 7.20773  | 3.31615  | Solute carrier family 24, member 5                              |

|          |          |          |         |                                                                 |
|----------|----------|----------|---------|-----------------------------------------------------------------|
| DNALI1   | 9.10807  | 7.38455  | 3.30240 | Dynein, axonemal, light intermediate chain 1                    |
| ASCC3    | 12.06895 | 10.35526 | 3.28000 | Activating signal cointegrator 1 complex subunit 3              |
| C19orf51 | 10.56784 | 8.86631  | 3.25246 | Chromosome 19 open reading frame 51                             |
| PXMP2    | 11.89255 | 10.19815 | 3.23642 | Peroxisomal membrane protein 2                                  |
| CD200    | 10.44194 | 8.77197  | 3.18209 | CD200 molecule                                                  |
| PPP2CB   | 11.63639 | 9.97414  | 3.16510 | Protein phosphatase 2, catalytic subunit, beta isoform          |
| TEAD1    | 10.64730 | 8.99103  | 3.15201 | TEA domain family member 1                                      |
| CDKN2C   | 10.52061 | 8.86714  | 3.14589 | Cyclin-dependent kinase inhibitor 2C                            |
| HERC5    | 9.36412  | 7.72313  | 3.11881 | Hect domain and RLD 5                                           |
| AXL      | 9.38561  | 7.74519  | 3.11756 | AXL receptor tyrosine kinase                                    |
| FYN      | 11.59414 | 9.96490  | 3.09350 | FYN oncogene related to SRC, FGR, YES                           |
| PHLDB2   | 11.73895 | 10.11964 | 3.07230 | Pleckstrin homology-like domain, family B, member 2             |
| PHF17    | 11.74861 | 10.13236 | 3.06576 | PHD finger protein 17                                           |
| RUNX3    | 9.18194  | 7.57262  | 3.05108 | Runt-related transcription factor 3                             |
| SLC27A3  | 9.93680  | 8.33085  | 3.04397 | Solute carrier family 27, member 3                              |
| PLXNB1   | 11.76135 | 10.15576 | 3.04320 | Plexin B1                                                       |
| ZSCAN2   | 11.39080 | 9.78576  | 3.04203 | Zinc finger and SCAN domain containing 2                        |
| ADD3     | 11.62280 | 10.01980 | 3.03775 | Adducin 3                                                       |
| H2AFJ    | 9.50654  | 7.90436  | 3.03603 | H2A histone family, member J                                    |
| MAOA     | 11.34870 | 9.76045  | 3.00684 | Monoamine oxidase A                                             |
| ANTXR1   | 12.57502 | 14.17067 | 0.33087 | Anthrax toxin receptor 1                                        |
| ICK      | 10.57563 | 12.19777 | 0.32485 | Intestinal cell (MAK-like) kinase                               |
| C11orf2  | 10.44153 | 12.06414 | 0.32475 | Chromosome 11 open reading frame 2                              |
| NEK9     | 8.04241  | 9.66945  | 0.32375 | NIMA (never in mitosis gene a)- related kinase 9                |
| KIAA0649 | 9.24663  | 10.87379 | 0.32372 | KIAA0649                                                        |
| HNMT     | 9.58247  | 11.21465 | 0.32260 | Histamine N-methyltransferase                                   |
| COL22A1  | 10.89466 | 12.52895 | 0.32213 | Collagen, type XXII, alpha 1                                    |
| ARSD     | 8.39053  | 10.02836 | 0.32134 | Arylsulfatase D                                                 |
| CDCP1    | 11.18116 | 12.82912 | 0.31909 | CUB domain containing protein 1                                 |
| PMP2     | 8.85990  | 10.51393 | 0.31775 | Peripheral myelin protein 2                                     |
| NKD2     | 7.52837  | 9.18251  | 0.31773 | Naked cuticle homolog 2                                         |
| RAPH1    | 10.76971 | 12.42652 | 0.31714 | Ras association (RalGDS/AF-6) and pleckstrin homology domains 1 |
| EXTL1    | 10.92275 | 12.58083 | 0.31686 | Exostoses-like 1                                                |
| GAS6     | 9.29896  | 10.96339 | 0.31547 | Growth arrest-specific 6                                        |
| FNTA     | 10.07473 | 11.74009 | 0.31527 | Farnesyltransferase, CAAX box, alpha                            |
| PLEKHM1  | 10.22616 | 11.89827 | 0.31379 | Pleckstrin homology domain containing, family M member 1        |
| AFF3     | 8.88570  | 10.56380 | 0.31249 | AF4/FMR2 family, member 3                                       |
| OSTC     | 11.05462 | 12.73519 | 0.31196 | Oligosaccharyltransferase complex subunit                       |
| THRA     | 8.79676  | 10.47933 | 0.31153 | Thyroid hormone receptor, alpha                                 |
| ANKRD50  | 8.86694  | 10.55700 | 0.30991 | Ankyrin repeat domain 50                                        |
| LARP6    | 8.97135  | 10.66694 | 0.30873 | La ribonucleoprotein domain family, member 6                    |
| C11orf75 | 8.22002  | 9.92669  | 0.30637 | Chromosome 11 open reading frame 75                             |
| KIAA1199 | 10.73413 | 12.45041 | 0.30433 | KIAA1199                                                        |
| GPX7     | 11.42481 | 13.14556 | 0.30339 | Glutathione peroxidase 7                                        |
| C9orf61  | 8.39503  | 10.11890 | 0.30273 | Chromosome 9 open reading frame 61                              |
| LPXN     | 11.72323 | 13.44884 | 0.30237 | Leupaxin                                                        |
| PC       | 9.81620  | 11.54371 | 0.30197 | Pyruvate carboxylase                                            |
| KIAA1026 | 8.79875  | 10.53235 | 0.30070 | Kazrin                                                          |
| CCL2     | 9.57129  | 11.31342 | 0.29893 | Chemokine (C-C motif) ligand 2                                  |
| CD96     | 10.81130 | 12.57242 | 0.29502 | CD96 molecule                                                   |
| CD82     | 8.69952  | 10.46120 | 0.29490 | CD82 molecule                                                   |
| IL1RAPL1 | 10.67359 | 12.45360 | 0.29118 | Interleukin 1 receptor accessory protein-like 1                 |
| NUP50    | 10.59533 | 12.37599 | 0.29105 | Nucleoporin 50kDa                                               |
| DIP2C    | 9.67648  | 11.45746 | 0.29099 | DIP2 disco-interacting protein 2 homolog C                      |
| NPAS1    | 11.06060 | 12.85524 | 0.28824 | Neuronal PAS domain protein 1                                   |
| CCDC130  | 9.91370  | 11.71957 | 0.28601 | Coiled-coil domain containing 130                               |
| PPP1R14A | 8.52519  | 10.33640 | 0.28495 | Protein phosphatase 1, regulatory subunit 14A                   |
| S100A3   | 10.56380 | 12.37706 | 0.28455 | S100 calcium binding protein A3                                 |

|           |          |          |         |                                                                           |
|-----------|----------|----------|---------|---------------------------------------------------------------------------|
| M160      | 11.12602 | 12.96038 | 0.28042 | Scavenger receptor cysteine-rich type 1 protein M160                      |
| ADCY3     | 10.50427 | 12.35890 | 0.27650 | Adenylate cyclase 3                                                       |
| BIRC3     | 7.78876  | 9.64373  | 0.27644 | Baculoviral IAP repeat-containing 3                                       |
| TUBB4     | 8.64411  | 10.50176 | 0.27593 | Tubulin, beta 4                                                           |
| ANXA2P1   | 9.44733  | 11.30642 | 0.27565 | Annexin A2 pseudogene 1                                                   |
| SPATA20   | 10.45862 | 12.32017 | 0.27518 | Spermatogenesis associated 20                                             |
| TOMM40    | 9.09901  | 10.96484 | 0.27436 | Translocase of outer mitochondrial membrane 40 homolog                    |
| RABL4     | 8.39161  | 10.26241 | 0.27342 | RAB, member of RAS oncogene family-like 4                                 |
| PKNOX2    | 8.10026  | 9.98509  | 0.27078 | PBX/knotted 1 homeobox 2                                                  |
| DUSP10    | 10.71877 | 12.60923 | 0.26972 | Dual specificity phosphatase 10                                           |
| RCN3      | 8.16367  | 10.05926 | 0.26876 | Reticulocalbin 3, EF-hand calcium binding domain                          |
| RAB3IL1   | 11.19338 | 13.09542 | 0.26757 | RAB3A interacting protein -like 1                                         |
| RHBDF2    | 10.08610 | 12.02018 | 0.26169 | Rhomboid 5 homolog 2                                                      |
| LENG8     | 8.27758  | 10.21776 | 0.26058 | Leukocyte receptor cluster (LRC) member 8                                 |
| LRP5      | 9.02946  | 11.00020 | 0.25512 | Low density lipoprotein receptor-related protein 5                        |
| EIF5B     | 10.45243 | 12.42455 | 0.25488 | Eukaryotic translation initiation factor 5B                               |
| LINGO1    | 7.89880  | 9.87127  | 0.25482 | Leucine rich repeat and Ig domain containing 1                            |
| LCP2      | 7.18065  | 9.16519  | 0.25269 | Lymphocyte cytosolic protein 2                                            |
| SYNC1     | 8.76752  | 10.76302 | 0.25078 | Syncoilin, intermediate filament 1                                        |
| KIAA0284  | 9.27724  | 11.27564 | 0.25028 | KIAA0284                                                                  |
| FOSB      | 9.37359  | 11.37611 | 0.24956 | FBJ murine osteosarcoma viral oncogene homolog B                          |
| NFATC2    | 9.55422  | 11.56120 | 0.24879 | Nuclear factor of activated T-cells, cytoplasmic, calcineurin-dependent 2 |
| TRIL      | 9.36977  | 11.38013 | 0.24821 | TLR4 interactor with leucine rich repeats                                 |
| SRPX2     | 8.89434  | 10.90618 | 0.24796 | Sushi-repeat-containing protein, X-linked 2                               |
| ECSCR     | 7.48007  | 9.50923  | 0.24500 | Endothelial cell-specific chemotaxis regulator                            |
| MYO1D     | 9.55578  | 11.58831 | 0.24443 | Myosin ID                                                                 |
| TPM1      | 10.55771 | 12.59431 | 0.24374 | Tropomyosin 1 (alpha)                                                     |
| DDIT4L    | 7.26020  | 9.29951  | 0.24328 | DNA-damage-inducible transcript 4-like                                    |
| CLDN23    | 9.70020  | 11.74450 | 0.24244 | Claudin 23                                                                |
| LUM       | 9.91915  | 11.96724 | 0.24180 | Lumican                                                                   |
| AKR1C2    | 11.00836 | 13.05803 | 0.24154 | Aldo-keto reductase family 1, member C2                                   |
| MTSS1     | 9.17036  | 11.22615 | 0.24052 | Metastasis suppressor 1                                                   |
| CCDC92    | 9.31352  | 11.37844 | 0.23900 | Coiled-coil domain containing 92                                          |
| C14orf139 | 9.33909  | 11.40498 | 0.23884 | Chromosome 14 open reading frame 139                                      |
| TJAP1     | 9.79883  | 11.87033 | 0.23791 | Tight junction associated protein 1                                       |
| ST8SIA1   | 8.47772  | 10.56407 | 0.23548 | ST8 alpha-N-acetyl-neuraminide alpha-2,8-sialyltransferase 1              |
| ENPP2     | 10.77222 | 12.86929 | 0.23373 | Ectonucleotide pyrophosphatase/phosphodiesterase 2                        |
| TRPV2     | 11.02026 | 13.12725 | 0.23213 | Transient receptor potential cation channel, subfamily V, member 2        |
| ITGAX     | 8.07269  | 10.18227 | 0.23171 | Integrin, alpha X                                                         |
| KBTBD11   | 7.20311  | 9.32382  | 0.22993 | Kelch repeat and BTB domain containing 11                                 |
| CD22      | 8.51472  | 10.64296 | 0.22874 | CD22 molecule                                                             |
| STEAP3    | 10.13533 | 12.26365 | 0.22872 | STEAP family member 3                                                     |
| NNT       | 9.59696  | 11.76210 | 0.22296 | Nicotinamide nucleotide transhydrogenase                                  |
| CCPG1     | 9.33075  | 11.49591 | 0.22296 | Cell cycle progression 1                                                  |
| SLC25A23  | 10.91748 | 13.09272 | 0.22141 | Solute carrier family 25, member 23                                       |
| INMT      | 8.54656  | 10.73371 | 0.21958 | Indolethylamine N-methyltransferase                                       |
| FLJ21986  | 9.09526  | 11.28441 | 0.21928 | Hypothetical protein FLJ21986                                             |
| LOC399959 | 10.20902 | 12.40456 | 0.21831 | Hypothetical LOC399959                                                    |
| FAM43B    | 7.81503  | 10.01598 | 0.21749 | Family with sequence similarity 43, member B                              |
| PNMAL1    | 10.86778 | 13.11861 | 0.21010 | PNMA-like 1                                                               |
| COL6A3    | 8.01069  | 10.28577 | 0.20660 | Collagen, type VI, alpha 3                                                |
| PLD3      | 8.22399  | 10.50392 | 0.20591 | Phospholipase D family, member 3                                          |
| CYP2S1    | 8.48025  | 10.76598 | 0.20508 | Cytochrome P450, family 2, subfamily S, polypeptide 1                     |
| EVI5L     | 10.43149 | 12.73063 | 0.20318 | Ecotropic viral integration site 5-like                                   |
| TMEM55A   | 8.56738  | 10.87655 | 0.20178 | Transmembrane protein 55A                                                 |
| HLA-DQA1  | 8.28197  | 10.62883 | 0.19657 | Major histocompatibility complex, class II, DQ alpha 1                    |
| CAPN3     | 8.46867  | 10.84132 | 0.19309 | Calpain 3                                                                 |
| MN1       | 9.41802  | 11.80150 | 0.19165 | Meningioma 1                                                              |
| CDC42EP5  | 8.03634  | 10.44836 | 0.18789 | CDC42 effector protein 5                                                  |

|          |          |          |         |                                                                       |
|----------|----------|----------|---------|-----------------------------------------------------------------------|
| LPAR1    | 9.36551  | 11.79889 | 0.18513 | Lysophosphatidic acid receptor 1                                      |
| CA5B     | 8.46033  | 10.97428 | 0.17508 | Carbonic anhydrase VB                                                 |
| TMSB4X   | 8.67161  | 11.21281 | 0.17180 | Thymosin, beta 4, X-linked                                            |
| MLPH     | 10.41878 | 13.08274 | 0.15779 | Melanophilin                                                          |
| D4S234E  | 8.14115  | 10.85973 | 0.15192 | DNA segment on chromosome 4 (unique) 234 expressed sequence           |
| BGN      | 9.80693  | 12.54725 | 0.14965 | Biglycan                                                              |
| CACHD1   | 9.38131  | 12.16724 | 0.14499 | Cache domain containing 1                                             |
| PPARGC1A | 8.26239  | 11.19891 | 0.13062 | Peroxisome proliferator-activated receptor gamma, coactivator 1 alpha |
| OLFML3   | 9.83603  | 12.84144 | 0.12453 | Olfactomedin-like 3                                                   |
| EPB41L3  | 9.88721  | 12.91278 | 0.12280 | Erythrocyte membrane protein band 4.1-like 3                          |
| SERPINH1 | 8.82203  | 11.92848 | 0.11611 | Serpin peptidase inhibitor, clade H (heat shock protein 47), member 1 |
| IGFBP7   | 8.32470  | 11.46769 | 0.11321 | Insulin-like growth factor binding protein 7                          |
| LRRC17   | 10.31902 | 13.52043 | 0.10871 | Leucine rich repeat containing 17                                     |
| FMOD     | 7.98981  | 11.38659 | 0.09494 | Fibromodulin                                                          |
| CDH15    | 8.47571  | 11.88595 | 0.09406 | Cadherin 15                                                           |
| MATK     | 7.47247  | 10.89993 | 0.09295 | Megakaryocyte-associated tyrosine kinase                              |
| PLA1A    | 8.43745  | 11.99869 | 0.08471 | Phospholipase A1 member A                                             |
| COL15A1  | 8.63297  | 12.25014 | 0.08149 | Collagen, type XV, alpha 1                                            |
| RASD2    | 8.86996  | 12.95747 | 0.05882 | RASD family, member 2                                                 |
| PROM1    | 8.32263  | 12.49243 | 0.05556 | Prominin 1                                                            |
| MAGEC2   | 7.14996  | 11.80072 | 0.03981 | Melanoma antigen family C, 2                                          |
