# Supplementary material
Source: PubMed Central journal article supplement (PMC4397107)
Supplement: NIHMS634694-supplement-8.pdf [file NIHMS634694-supplement-8.pdf]

| Gene     | P-value  | 1-high in<br>cerebrotropic<br>patients | Definition                                                                              |
|----------|----------|----------------------------------------|-----------------------------------------------------------------------------------------|
| BCHE     | 2.00E-04 | 1                                      | Butyrylcholinesterase                                                                   |
| PLCB2    | 2.00E-04 | -1                                     | Phospholipase C, beta 2                                                                 |
| SF3B1    | 2.00E-04 | -1                                     | Splicing factor 3b, subunit 1                                                           |
| BCHE     | 0.00022  | 1                                      | Butyrylcholinesterase                                                                   |
| ZNF721   | 0.00028  | -1                                     | Zinc finger protein 721                                                                 |
| GNAI1    | 0.00044  | 1                                      | Guanine nucleotide binding protein (G protein), alpha inhibiting activity polypeptide 1 |
| GNAI1    | 0.00049  | 1                                      | Guanine nucleotide binding protein (G protein), alpha inhibiting activity polypeptide 1 |
| PDE1B    | 0.00069  | -1                                     | Phosphodiesterase 1B, calmodulin-dependent                                              |
| MCOLN2   | 0.00085  | -1                                     | Mucolipin 2                                                                             |
| PGCP     | 0.00116  | 1                                      | Plasma glutamate carboxypeptidase                                                       |
| TMX4     | 0.00116  | 1                                      | Thioredoxin-related transmembrane protein 4                                             |
| C10orf11 | 0.00142  | 1                                      | Chromosome 10 open reading frame 11                                                     |
| TRIM14   | 0.00156  | -1                                     | Tripartite motif-containing 14                                                          |
| APOBEC3D | 0.00173  | -1                                     | Apolipoprotein B mRNA editing enzyme, catalytic polypeptide-like 3D                     |
| ANXA6    | 0.00185  | -1                                     | Annexin A6                                                                              |
| NOS3     | 0.00209  | -1                                     | Nitric oxide synthase 3                                                                 |
| SELI     | 0.00209  | -1                                     | Selenoprotein I                                                                         |
| NYNRIN   | 0.0023   | -1                                     | NYN domain and retroviral integrase containing                                          |
| ANKFY1   | 0.00253  | -1                                     | Ankyrin repeat and FYVE domain containing 1                                             |
| APOBEC3F | 0.00278  | -1                                     | Apolipoprotein B mRNA editing enzyme, catalytic polypeptide-like 3F                     |
| EBI2     | 0.00278  | -1                                     | Epstein-Barr virus induced gene 2                                                       |
| ETHE1    | 0.00278  | 1                                      | Ethylmalonic encephalopathy 1                                                           |
| PDE7A    | 0.00278  | -1                                     | Phosphodiesterase 7A                                                                    |
| HLA-DOA  | 0.00305  | -1                                     | Major histocompatibility complex, class II, DO alpha                                    |
| SOX13    | 0.00305  | 1                                      | SRY (sex determining region Y)-box 13                                                   |
| ABHD2    | 3.34E-03 | 1                                      | Abhydrolase domain containing 2                                                         |
| MOCS2    | 0.00334  | 1                                      | Molybdenum cofactor synthesis 2                                                         |
| TTL6     | 0.00365  | -1                                     | Tubulin tyrosine ligase-like family, member 6                                           |
| SHANK3   | 0.00394  | -1                                     | SH3 and multiple ankyrin repeat domains 3                                               |
| ADCY4    | 0.004    | -1                                     | Adenylate cyclase 4                                                                     |
| CD3D     | 0.004    | -1                                     | CD3d molecule, delta (CD3-TCR complex) (CD3D), transcript variant 1, mRNA.              |
| CRIPAK   | 0.004    | -1                                     | Cysteine-Rich PAK1 Inhibitor                                                            |
| VASH1    | 0.00436  | -1                                     | Vasohibin 1                                                                             |

|              |          |    |                                                         |
|--------------|----------|----|---------------------------------------------------------|
| NAPSB        | 0.00476  | -1 | Napsin B aspartic peptidase pseudogene                  |
| RAD51C       | 0.00476  | -1 | RAD51 homolog C                                         |
| PNMA3        | 0.00502  | -1 | Paraneoplastic antigen MA3                              |
| CCND2        | 0.0052   | -1 | Cyclin D2                                               |
| INVS         | 0.0052   | -1 | Inversin                                                |
| AMHR2        | 0.00566  | -1 | Anti-Mullerian hormone receptor, type II                |
| ERICH1       | 0.00566  | -1 | Glutamate-rich 1                                        |
| GSDMB        | 0.00566  | -1 | Gasdermin B                                             |
| MAP4K1       | 0.00566  | -1 | Mitogen-activated protein kinase kinase kinase kinase 1 |
| SLC25A45     | 0.00566  | -1 | Solute carrier family 25, member 45                     |
| SH2D3C       | 0.00616  | -1 | SH2 domain containing 3C                                |
| BMP2K        | 0.0067   | -1 | BMP2 inducible kinase                                   |
| DNAH1        | 0.0067   | -1 | Dynein, axonemal, heavy chain 1                         |
| JAK1         | 0.0067   | -1 | Janus kinase 1 (JAK1)                                   |
| KIAA1026     | 0.0067   | 1  | Kazrin                                                  |
| LSM5         | 0.0067   | 1  | LSM5 homolog, U6 small nuclear RNA associated           |
| MED13        | 0.0067   | -1 | Mediator complex subunit 13                             |
| MGC3771      | 0.0067   | -1 | Hypothetical LOC81854                                   |
| CC2D1A       | 0.00728  | 1  | Coiled-coil and C2 domain containing 1A                 |
| QDPR         | 0.00728  | 1  | Quinoid dihydropteridine reductase                      |
| ABHD4        | 7.91E-03 | -1 | Abhydrolase domain containing 4                         |
| LOC100132247 | 0.00791  | -1 | Similar to Uncharacterized protein KIAA0220             |
| PRKCB1       | 0.00791  | -1 | Protein kinase C, beta 1                                |
| PSCD1        | 0.00791  | -1 | Pleckstrin homology, Sec7 and coiled-coil domains 1     |
| PTPN7        | 0.00791  | -1 | Protein tyrosine phosphatase, non-receptor type 7       |
| RAB37        | 0.00791  | -1 | RAB37, member RAS oncogene family                       |
| ADRBK2       | 0.00858  | -1 | Adrenergic, beta, receptor kinase 2                     |
| NTN5         | 0.00858  | -1 | Netrin 5                                                |
| PHLDA1       | 0.00858  | 1  | Pleckstrin homology-like domain, family A, member 1     |
| TMX4         | 0.00858  | 1  | Thioredoxin-related transmembrane protein 4             |
| ZBTB25       | 0.00858  | -1 | Zinc finger and BTB domain containing 25                |
| IL4R         | 0.0093   | -1 | Interleukin 4 receptor                                  |
| IRX5         | 0.0093   | 1  | Iroquois homeobox protein 5                             |
| PMS2L3       | 0.0093   | -1 | Postmeiotic segregation increased 2-like 3              |
| PSRC1        | 0.0093   | 1  | Proline/serine-rich coiled-coil 1                       |
| ZNF586       | 0.0093   | -1 | Zinc finger protein 586                                 |

|           |         |    |                                                              |
|-----------|---------|----|--------------------------------------------------------------|
| ZNF587    | 0.0093  | -1 | Zinc finger protein 587                                      |
| CNKSR3    | 0.01007 | 1  | CNKSR family member 3                                        |
| LFNG      | 0.01007 | -1 | LFNG O-fucosylpeptide 3-beta-N-acetylglucosaminyltransferase |
| NRCAM     | 0.01007 | 1  | Neuronal cell adhesion molecule                              |
| POLN      | 0.01007 | -1 | Polymerase (DNA directed) nu                                 |
| UCP2      | 0.01007 | -1 | Uncoupling protein 2                                         |
| C14orf131 | 0.01078 | -1 | Chromosome 14 open reading frame 131                         |
| KCTD1     | 0.0109  | 1  | Potassium channel tetramerisation domain containing 1        |
| PERP      | 0.0109  | 1  | PERP, TP53 apoptosis effector                                |
| MRRF      | 0.0116  | -1 | Mitochondrial ribosome recycling factor                      |
| ARHGAP22  | 0.01179 | -1 | Rho GTPase activating protein 22                             |
| ARID4A    | 0.01179 | -1 | AT rich interactive domain 4A                                |
| ARL4A     | 0.01179 | 1  | ADP-ribosylation factor-like 4A                              |
| CD6       | 0.01179 | -1 | CD6 molecule                                                 |
| GHRL      | 0.01179 | -1 | Ghrelin/obestatin preprohormone                              |
| RASGRP1   | 0.01179 | -1 | RAS guanyl releasing protein 1                               |
| ANXA6     | 0.01273 | -1 | Annexin A6                                                   |
| BCL3      | 0.01273 | -1 | B-cell CLL/lymphoma 3                                        |
| CYTH3     | 0.01273 | 1  | Cytohesin 3                                                  |
| EIF5A2    | 0.01273 | 1  | Eukaryotic translation initiation factor 5A2                 |
| HDC       | 0.01273 | -1 | Histidine decarboxylase                                      |
| IREB2     | 0.01273 | -1 | Iron-responsive element binding protein 2                    |
| SPNS2     | 0.01273 | -1 | Spinster homolog 2                                           |
| DNHD1     | 0.01374 | -1 | Dynein heavy chain domain 1                                  |
| FAM78A    | 0.01374 | -1 | Family with sequence similarity 78, member A                 |
| GIMAP5    | 0.01374 | -1 | GTPase, IMAP family member 5                                 |
| IRF8      | 0.01374 | -1 | Interferon regulatory factor 8                               |
| PARVB     | 0.01374 | -1 | Parvin, beta                                                 |
| WNT2B     | 0.01374 | -1 | Wingless-type MMTV integration site family, member 2B        |
| CHEK2     | 0.01482 | -1 | CHK2 checkpoint homolog                                      |
| DENND1C   | 0.01482 | -1 | DENN/MADD domain containing 1C                               |
| ENTPD1    | 0.01482 | -1 | Ectonucleoside triphosphate diphosphohydrolase 1             |
| FGL2      | 0.01482 | -1 | Fibrinogen-like 2                                            |
| ICAM2     | 0.01482 | -1 | Intercellular adhesion molecule 2                            |
| NKTR      | 0.01482 | -1 | Natural killer-tumor recognition sequence                    |
| RHEB      | 0.01482 | 1  | Ras homolog enriched in brain                                |

|           |         |    |                                                                                                                        |
|-----------|---------|----|------------------------------------------------------------------------------------------------------------------------|
| TMEM164   | 0.01482 | 1  | Transmembrane protein 164                                                                                              |
| CAMK2D    | 0.01491 | 1  | Calcium/calmodulin-dependent protein kinase (CaM kinase) II delta                                                      |
| PSCD4     | 0.01545 | -1 | Pleckstrin homology, Sec7 and coiled-coil domains 4                                                                    |
| ERCC3     | 0.01597 | -1 | Excision repair cross-complementing rodent repair deficiency, complementation group 3                                  |
| GDPD3     | 0.01597 | -1 | Glycerophosphodiester phosphodiesterase domain containing 3                                                            |
| MAD1L1    | 0.01597 | 1  | MAD1 mitotic arrest deficient-like 1                                                                                   |
| PPHLN1    | 0.01597 | -1 | Periphilin 1                                                                                                           |
| PLA2G4B   | 0.01657 | -1 | Phospholipase A2, group IVB                                                                                            |
| CSTF3     | 0.01716 | -1 | Cleavage stimulation factor, 3' pre-RNA, subunit 3                                                                     |
| ETV5      | 0.01716 | 1  | Ets variant gene 5                                                                                                     |
| FAM119A   | 0.01716 | 1  | Family with sequence similarity 119, member A                                                                          |
| ARL4A     | 0.0172  | 1  | ADP-ribosylation factor-like 4A                                                                                        |
| C10orf137 | 0.0172  | -1 | Chromosome 10 open reading frame 137                                                                                   |
| CARD16    | 0.0172  | 1  | Caspase recruitment domain family, member 16                                                                           |
| FBXO34    | 0.0172  | -1 | F-box protein 34                                                                                                       |
| FLJ33590  | 0.0172  | -1 | Hypothetical protein FLJ33590                                                                                          |
| STXBP6    | 0.0172  | 1  | Syntaxin binding protein 6                                                                                             |
| DDRGK1    | 0.01777 | 1  | DDRGK domain containing 1                                                                                              |
| DEF6      | 0.01839 | -1 | Differentially expressed in FDCP 6 homolog                                                                             |
| ANKRA2    | 0.01851 | -1 | Ankyrin repeat, family A (RFXANK-like), 2                                                                              |
| CBFA2T3   | 0.01851 | -1 | Core-binding factor, runt domain, alpha subunit 2; translocated to, 3                                                  |
| CCDC102A  | 0.01851 | -1 | Coiled-coil domain containing 102A                                                                                     |
| EML1      | 0.01851 | -1 | Echinoderm microtubule associated protein like 1                                                                       |
| GIMAP7    | 0.01851 | -1 | GTPase, IMAP family member 7                                                                                           |
| KIAA0922  | 0.01851 | -1 | KIAA0922                                                                                                               |
| SEMA4A    | 0.01851 | -1 | Sema domain, immunoglobulin domain (Ig), transmembrane domain <sup>TM</sup> ,short cytoplasmic domain, (semaphorin) 4A |
| SNRPB2    | 0.01851 | 1  | Small nuclear ribonucleoprotein polypeptide B                                                                          |
| WDR5      | 0.01851 | 1  | WD repeat domain 5                                                                                                     |
| C1QTNF6   | 0.0197  | -1 | C1q and tumor necrosis factor related protein 6                                                                        |
| CLEC12A   | 0.0199  | -1 | C-type lectin domain family 12, member A                                                                               |
| COX4NB    | 0.0199  | -1 | COX4 neighbor                                                                                                          |
| ECHDC1    | 0.0199  | 1  | Enoyl Coenzyme A hydratase domain containing 1                                                                         |
| HEY1      | 0.0199  | 1  | Hairy/enhancer-of-split related with YRPW motif 1                                                                      |
| IER3IP1   | 0.0199  | 1  | Immediate early response 3 interacting protein 1 (IER3IP1), mRNA.                                                      |
| MAP3K14   | 0.0199  | -1 | Mitogen-activated protein kinase kinase kinase 14                                                                      |
| MUT       | 0.0199  | 1  | Methylmalonyl Coenzyme A mutase                                                                                        |

|           |         |    |                                                                |
|-----------|---------|----|----------------------------------------------------------------|
| NDRG2     | 0.0199  | 1  | NDRG family member 2                                           |
| PLEKHA5   | 0.0199  | 1  | Pleckstrin homology domain containing, family A member 5       |
| PSTPIP2   | 0.0199  | -1 | Proline-serine-threonine phosphatase interacting protein 2     |
| RASSF4    | 0.0199  | -1 | Ras association (RalGDS/AF-6) domain family member 4           |
| RNF165    | 0.0199  | -1 | Ring finger protein 165                                        |
| SELO      | 0.0199  | -1 | Selenoprotein O                                                |
| SH3BGRL2  | 0.0199  | -1 | SH3 domain binding glutamic acid-rich protein like 2           |
| TRIM17    | 0.0199  | -1 | Tripartite motif-containing 17                                 |
| CAV2      | 0.02039 | 1  | Caveolin 2                                                     |
| C9orf169  | 0.02109 | 1  | Chromosome 9 open reading frame 169                            |
| ACSL5     | 0.02138 | -1 | Acyl-CoA synthetase long-chain family member 5                 |
| CASP8     | 0.02138 | -1 | Caspase 8, apoptosis-related cysteine peptidase                |
| GPR108    | 0.02138 | 1  | G protein-coupled receptor 108                                 |
| HEY1      | 0.02138 | 1  | Hairy/enhancer-of-split related with YRPW motif 1              |
| HYAL1     | 0.02138 | -1 | Hyaluronoglucosaminidase 1                                     |
| KBTBD7    | 0.02138 | 1  | Kelch repeat and BTB (POZ) domain containing 7                 |
| LATS2     | 0.02138 | -1 | LATS, large tumor suppressor, homolog 2                        |
| LRMP      | 0.02138 | -1 | Lymphoid-restricted membrane protein                           |
| MGC42367  | 0.02138 | -1 | Similar to 2010300C02Rik protein                               |
| MTO1      | 0.02138 | -1 | Mitochondrial translation optimization 1                       |
| OXNAD1    | 0.02138 | -1 | Oxidoreductase NAD-binding domain containing 1                 |
| PVRIG     | 0.02138 | -1 | Poliovirus receptor related immunoglobulin domain containing   |
| SFRS2IP   | 0.02138 | -1 | Splicing factor, arginine/serine-rich 2, interacting protein   |
| TMCC1     | 0.02138 | -1 | Transmembrane and coiled-coil domain family 1                  |
| TNFRSF13B | 0.02138 | -1 | Tumor necrosis factor receptor superfamily, member 13B         |
| TUBGCP6   | 0.02138 | -1 | Tubulin, gamma complex associated protein 6                    |
| CRYBB2    | 0.02257 | -1 | Crystallin, beta B2                                            |
| BTN3A2    | 0.02295 | -1 | Butyrophilin, subfamily 3, member A2                           |
| CHRD      | 0.02295 | -1 | Chordin                                                        |
| DBNDD1    | 0.02295 | 1  | Dysbindin (dystrobrevin binding protein 1) domain containing 1 |
| FAM193B   | 0.02295 | -1 | Family with sequence similarity 193, member B                  |
| FAM86D    | 0.02295 | 1  | Family with sequence similarity 86, member D                   |
| ISYNA1    | 0.02295 | 1  | Inositol-3-phosphate synthase 1                                |
| MLXIPL    | 0.02295 | -1 | MLX interacting protein-like                                   |
| PARVG     | 0.02295 | -1 | Parvin, gamma                                                  |
| RBM6      | 0.02295 | -1 | RNA binding motif protein 6                                    |

|           |         |    |                                                                    |
|-----------|---------|----|--------------------------------------------------------------------|
| TMEM209   | 0.02295 | 1  | Transmembrane protein 209                                          |
| WASF3     | 0.02295 | -1 | WAS protein family, member 3                                       |
| GALT      | 0.02334 | -1 | Galactose-1-phosphate uridylyltransferase                          |
| PAPD5     | 0.02334 | -1 | PAP associated domain containing 5                                 |
| RASL12    | 0.02413 | -1 | RAS-like, family 12                                                |
| ACOT7     | 0.02462 | -1 | Acyl-CoA thioesterase 7                                            |
| ADARB1    | 0.02462 | -1 | Adenosine deaminase, RNA-specific, B1                              |
| ARHGEF6   | 0.02462 | -1 | Rac/Cdc42 guanine nucleotide exchange factor (GEF) 6               |
| C17orf68  | 0.02462 | -1 | Chromosome 17 open reading frame 68                                |
| C20orf160 | 0.02462 | -1 | Chromosome 20 open reading frame 160                               |
| EID2B     | 0.02462 | -1 | EP300 interacting inhibitor of differentiation 2B                  |
| GTF2H3    | 0.02462 | -1 | General transcription factor IIH, polypeptide 3                    |
| ITGAL     | 0.02462 | -1 | Integrin, alpha L                                                  |
| LDHA      | 0.02462 | 1  | Lactate dehydrogenase A                                            |
| PXDN      | 0.02462 | 1  | Peroxidasin homolog                                                |
| RNF14     | 0.02462 | 1  | Ring finger protein 14                                             |
| SCARA3    | 0.02462 | -1 | Scavenger receptor class A, member 3                               |
| SLC35B4   | 0.02462 | 1  | Solute carrier family 35, member B4                                |
| SOLH      | 0.02462 | -1 | Small optic lobes homolog                                          |
| TFG       | 0.02462 | 1  | TRK-fused gene (TFG), transcript variant 1                         |
| TNFAIP2   | 0.02462 | -1 | Tumor necrosis factor, alpha-induced protein 2                     |
| EPB41     | 0.02578 | 1  | Erythrocyte membrane protein band 4.1                              |
| ACVR1B    | 0.02639 | -1 | Activin A receptor, type IB                                        |
| ATAD1     | 0.02639 | 1  | ATPase family, AAA domain containing 1                             |
| BRD1      | 0.02639 | -1 | Bromodomain containing 1                                           |
| DGKA      | 0.02639 | -1 | Diacylglycerol kinase, alpha                                       |
| DNAJB1    | 0.02639 | 1  | DnaJ (Hsp40) homolog, subfamily B, member 1                        |
| FBXO10    | 0.02639 | 1  | F-box protein 10                                                   |
| GOLGA8B   | 0.02639 | -1 | Golgi autoantigen, golgin subfamily a, 8B                          |
| MBLAC2    | 0.02639 | 1  | Metallo-beta-lactamase domain containing 2                         |
| MRFAP1L1  | 0.02639 | -1 | Morf4 family associated protein 1-like 1                           |
| NF2       | 0.02639 | -1 | Neurofibromin 2                                                    |
| PPHLN1    | 0.02639 | -1 | Periplin 1                                                         |
| PROM1     | 0.02639 | 1  | Prominin 1                                                         |
| RWDD3     | 0.02639 | -1 | RWD domain containing 3                                            |
| TRPC1     | 0.02639 | -1 | Transient receptor potential cation channel, subfamily C, member 1 |

|          |         |    |                                                                                               |
|----------|---------|----|-----------------------------------------------------------------------------------------------|
| NFATC2IP | 0.02665 | -1 | Nuclear factor of activated T-cells, cytoplasmic, calcineurin-dependent 2 interacting protein |
| ARHGDI1B | 0.02749 | -1 | Rho GDP dissociation inhibitor (GDI) beta                                                     |
| ACOX2    | 0.02754 | -1 | Acyl-Coenzyme A oxidase 2, branched chain                                                     |
| ALOX5    | 0.02827 | -1 | Arachidonate 5-lipoxygenase                                                                   |
| CYP2J2   | 0.02827 | -1 | Cytochrome P450, family 2, subfamily J, polypeptide 2                                         |
| FLJ10213 | 0.02827 | -1 | Hypothetical protein FLJ10213                                                                 |
| FNBP4    | 0.02827 | -1 | Formin binding protein 4                                                                      |
| KIAA1737 | 0.02827 | 1  | KIAA1737                                                                                      |
| SOBP     | 0.02827 | 1  | Sine oculis binding protein homolog                                                           |
| ST7      | 0.02827 | 1  | Suppression of tumorigenicity 7                                                               |
| TSC1     | 0.02827 | -1 | Tuberous sclerosis 1                                                                          |
| ZC3H12A  | 0.02827 | -1 | Zinc finger CCCH-type containing 12A                                                          |
| ZNF225   | 0.02827 | -1 | Zinc finger protein 225                                                                       |
| CD83     | 0.02845 | -1 | CD83 molecule                                                                                 |
| KIAA1026 | 0.02845 | 1  | Kazrin                                                                                        |
| SFI1     | 0.02845 | -1 | Sfi1 homolog, spindle assembly associated                                                     |
| ALS2CR11 | 0.03025 | -1 | Amyotrophic lateral sclerosis 2 (juvenile) chromosome region, candidate 11                    |
| ARPC5L   | 0.03025 | -1 | Actin related protein 2/3 complex, subunit 5-like                                             |
| ASB7     | 0.03025 | -1 | Ankyrin repeat and SOCS box-containing 7                                                      |
| C1orf103 | 0.03025 | 1  | Chromosome 1 open reading frame 103                                                           |
| C1S      | 0.03025 | -1 | Complement component 1, s subcomponent                                                        |
| FLJ35220 | 0.03025 | -1 | Hypothetical protein FLJ35220                                                                 |
| FMNL3    | 0.03025 | -1 | Formin-like 3                                                                                 |
| FNTA     | 0.03025 | -1 | Farnesyltransferase, CAAX box, alpha                                                          |
| MAP3K3   | 0.03025 | -1 | Mitogen-activated protein kinase kinase kinase 3                                              |
| N4BP2L2  | 0.03025 | -1 | NEDD4 binding protein 2-like 2                                                                |
| NAP1L1   | 0.03025 | 1  | Nucleosome assembly protein 1-like 1                                                          |
| NT5C3    | 0.03025 | 1  | 5'-nucleotidase, cytosolic III                                                                |
| SLC25A35 | 0.03025 | -1 | Solute carrier family 25, member 35                                                           |
| SOCS1    | 0.03025 | -1 | Suppressor of cytokine signaling 1                                                            |
| TOR1AIP2 | 0.03025 | 1  | Torsin A interacting protein 2                                                                |
| TUB      | 0.03025 | -1 | Tubby homolog                                                                                 |
| YAF2     | 0.03025 | -1 | YY1 associated factor 2                                                                       |
| ZNF521   | 0.03025 | -1 | Zinc finger protein 521                                                                       |
| IL11RA   | 0.03135 | -1 | Interleukin 11 receptor, alpha                                                                |
| PRDX5    | 0.03135 | 1  | Peroxiredoxin 5                                                                               |

|           |          |    |                                                                                                      |
|-----------|----------|----|------------------------------------------------------------------------------------------------------|
| ALG1L     | 0.03235  | 1  | Asparagine-linked glycosylation 1-like                                                               |
| AMMECR1   | 0.03235  | -1 | Alport syndrome, mental retardation, midface hypoplasia and elliptocytosis chromosomal region gene 1 |
| ATP1A1    | 0.03235  | 1  | ATPase, Na <sup>+</sup> /K <sup>+</sup> transporting, alpha 1 polypeptide                            |
| C20orf46  | 0.03235  | -1 | Chromosome 20 open reading frame 46                                                                  |
| CAV1      | 0.03235  | 1  | Caveolin 1, caveolae protein                                                                         |
| CD300LG   | 0.03235  | -1 | CD300 molecule-like family member g                                                                  |
| COMT      | 0.03235  | -1 | Catechol-O-methyltransferase                                                                         |
| DENND3    | 0.03235  | -1 | DENN/MADD domain containing 3                                                                        |
| DRD4      | 0.03235  | -1 | Dopamine receptor D4                                                                                 |
| GGCT      | 0.03235  | 1  | Gamma-glutamyl cyclotransferase                                                                      |
| GIMAP1    | 0.03235  | -1 | GTPase, IMAP family member 1                                                                         |
| GJB1      | 0.03235  | 1  | Gap junction protein, beta 1                                                                         |
| GPRIN3    | 0.03235  | -1 | GPRIN family member 3                                                                                |
| MAP7D1    | 0.03235  | 1  | MAP7 domain containing 1                                                                             |
| USP9X     | 0.03235  | 1  | Ubiquitin specific peptidase 9, X-linked                                                             |
| TDP1      | 0.03237  | -1 | Tyrosyl-DNA phosphodiesterase 1 .                                                                    |
| ZMAT1     | 0.03237  | -1 | Zinc finger, matrin type 1                                                                           |
| FBLN1     | 0.03342  | 1  | Fibulin 1                                                                                            |
| ABHD2     | 3.45E-02 | 1  | Abhydrolase domain containing 2                                                                      |
| ARHGAP25  | 0.03458  | -1 | Rho GTPase activating protein 25                                                                     |
| ARL6IP6   | 0.03458  | -1 | ADP-ribosylation-like factor 6 interacting protein 6                                                 |
| AUH       | 0.03458  | -1 | AU RNA binding protein/enoyl-Coenzyme A hydratase                                                    |
| CCR7      | 0.03458  | -1 | Chemokine (C-C motif) receptor 7                                                                     |
| DISP1     | 0.03458  | 1  | Dispatched homolog 1                                                                                 |
| DYNC1H1   | 0.03458  | 1  | Dynein, cytoplasmic 1, intermediate chain 1                                                          |
| ECE2      | 0.03458  | 1  | Endothelin converting enzyme 2                                                                       |
| FLJ22662  | 0.03458  | -1 | Hypothetical protein FLJ22662                                                                        |
| GRAP      | 0.03458  | -1 | GRB2-related adaptor protein                                                                         |
| LAD1      | 0.03458  | -1 | Ladinin 1                                                                                            |
| LGALS9    | 0.03458  | -1 | Lectin, galactoside-binding, soluble, 9                                                              |
| LOC286367 | 0.03458  | -1 | FP944                                                                                                |
| LOC93349  | 0.03458  | -1 | Hypothetical protein BC004921                                                                        |
| LYN       | 0.03458  | -1 | v-yes-1 Yamaguchi sarcoma viral related oncogene homolog                                             |
| NDRG4     | 0.03458  | -1 | NDRG family member 4                                                                                 |
| POLR2K    | 0.03458  | 1  | Polymerase (RNA) II (DNA directed) polypeptide K                                                     |
| SELL      | 0.03458  | -1 | Selectin L                                                                                           |



|            |         |    |                                                                               |
|------------|---------|----|-------------------------------------------------------------------------------|
| SOX18      | 0.03458 | -1 | SRY (sex determining region Y)-box 18                                         |
| STARD3NL   | 0.03458 | 1  | STARD3 N-terminal like                                                        |
| TCP10L     | 0.03458 | -1 | Sapiens t-complex 10-like                                                     |
| TLR4       | 0.03458 | -1 | Toll-like receptor 4                                                          |
| TRPM6      | 0.03458 | 1  | Transient receptor potential cation channel, subfamily M, member 6            |
| ZNF540     | 0.03458 | -1 | Zinc finger protein 540                                                       |
| B4GALT6    | 0.03561 | 1  | UDP-Gal:betaGlcNAc beta 1,4- galactosyltransferase, polypeptide 6             |
| BCOR       | 0.03561 | -1 | BCL6 co-repressor                                                             |
| CHCHD3     | 0.03675 | 1  | Coiled-coil-helix-coiled-coil-helix domain containing 3                       |
| B3GNT1     | 0.03692 | 1  | UDP-GlcNAc:betaGal beta-1,3-N-acetylglucosaminyltransferase 1                 |
| BZRAP1     | 0.03692 | -1 | Benzodiazapine receptor associated protein 1                                  |
| C14orf102  | 0.03692 | -1 | Chromosome 14 open reading frame 102                                          |
| CALCOCO1   | 0.03692 | -1 | Calcium binding and coiled-coil domain 1                                      |
| CBR3       | 0.03692 | 1  | Carbonyl reductase 3                                                          |
| CD96       | 0.03692 | -1 | CD96 molecule                                                                 |
| DOCK7      | 0.03692 | 1  | Dedicator of cytokinesis 7                                                    |
| ERP27      | 0.03692 | -1 | Endoplasmic reticulum protein                                                 |
| EXD3       | 0.03692 | -1 | Exonuclease 3'-5' domain containing 3                                         |
| FYN        | 0.03692 | -1 | FYN oncogene related to SRC, FGR, YES                                         |
| GFI1       | 0.03692 | -1 | Growth factor independent 1 transcription repressor                           |
| GPX7       | 0.03692 | -1 | Glutathione peroxidase 7                                                      |
| HIST2H2AA3 | 0.03692 | -1 | Histone cluster 2, H2aa3                                                      |
| IKBKE      | 0.03692 | -1 | Inhibitor of kappa light polypeptide gene enhancer in B-cells, kinase epsilon |
| KL         | 0.03692 | -1 | Klotho                                                                        |
| MEGF9      | 0.03692 | -1 | Multiple EGF-like-domains 9                                                   |
| NUAK2      | 0.03692 | -1 | NUAK family, SNF1-like kinase, 2                                              |
| PKIA       | 0.03692 | -1 | Protein kinase inhibitor alpha                                                |
| PRKAR1A    | 0.03692 | 1  | Protein kinase, cAMP-dependent, regulatory, type I, alpha                     |
| RHCE       | 0.03692 | 1  | Rh blood group, CcEe antigens                                                 |
| SBF1       | 0.03692 | -1 | SET binding factor 1                                                          |
| SEL1L      | 0.03692 | -1 | Sel-1 suppressor of lin-12-like                                               |
| TMEM183A   | 0.03692 | -1 | Transmembrane protein 183A                                                    |
| ZCCHC8     | 0.03692 | -1 | Zinc finger, CCHC domain containing 8                                         |
| ZFYVE26    | 0.03692 | -1 | Zinc finger, FYVE domain containing 26                                        |
| ZNF215     | 0.03692 | -1 | Zinc finger protein 215                                                       |
| TRMT112    | 0.03792 | 1  | tRNA methyltransferase 11-2 homolog                                           |

|           |         |    |                                                                                           |
|-----------|---------|----|-------------------------------------------------------------------------------------------|
| SGK1      | 0.03912 | 1  | Serum/glucocorticoid regulated kinase 1                                                   |
| ACVRL1    | 0.0394  | -1 | Activin A receptor type II-like 1                                                         |
| ADAMTSL2  | 0.0394  | -1 | ADAMTS-like 2                                                                             |
| BRP44     | 0.0394  | 1  | Brain protein 44                                                                          |
| BTBD3     | 0.0394  | 1  | BTB (POZ) domain containing 3                                                             |
| BTG2      | 0.0394  | -1 | BTG family, member 2                                                                      |
| C17orf80  | 0.0394  | -1 | Chromosome 17 open reading frame 80                                                       |
| C21orf130 | 0.0394  | 1  | Chromosome 21 open reading frame 130                                                      |
| CARD9     | 0.0394  | -1 | Caspase recruitment domain family, member 9                                               |
| HIST1H3F  | 0.0394  | -1 | Histone cluster 1, H3f                                                                    |
| HSD17B11  | 0.0394  | 1  | Hydroxysteroid (17-beta) dehydrogenase 11                                                 |
| LRRK1     | 0.0394  | -1 | Leucine-rich repeat kinase 1                                                              |
| MED28     | 0.0394  | -1 | Mediator complex subunit 28                                                               |
| MGC12965  | 0.0394  | 1  | Similar to Cytochrome c, somatic                                                          |
| NEO1      | 0.0394  | 1  | Neogenin homolog 1                                                                        |
| PPP1R15B  | 0.0394  | -1 | Protein phosphatase 1, regulatory subunit 15B                                             |
| RAP1GAP   | 0.0394  | 1  | RAP1 GTPase activating protein                                                            |
| SPAG1     | 0.0394  | -1 | Sperm associated antigen 1                                                                |
| STMN1     | 0.0394  | 1  | Stathmin 1                                                                                |
| VSIG8     | 0.0394  | -1 | V-set and immunoglobulin domain containing 8                                              |
| ZNF331    | 0.0394  | -1 | Zinc finger protein 331                                                                   |
| C12orf41  | 0.04036 | -1 | Chromosome 12 open reading frame 41                                                       |
| ARL11     | 0.04162 | -1 | ADP-ribosylation factor-like 11                                                           |
| RAPGEF6   | 0.04162 | -1 | Rap guanine nucleotide exchange factor (GEF) 6                                            |
| ABLIM1    | 0.04202 | -1 | Actin binding LIM protein 1                                                               |
| ADRA1B    | 0.04202 | -1 | Adrenergic, alpha-1B-, receptor                                                           |
| ATHL1     | 0.04202 | -1 | ATH1, acid trehalase-like 1                                                               |
| C18orf51  | 0.04202 | 1  | Chromosome 18 open reading frame 51                                                       |
| C2        | 0.04202 | -1 | Complement component 2                                                                    |
| COPG2     | 0.04202 | 1  | Coatomer protein complex, subunit gamma 2                                                 |
| FAM174A   | 0.04202 | 1  | Family with sequence similarity 174, member A                                             |
| FBS1      | 0.04202 | -1 | Fibrosin 1                                                                                |
| GNG11     | 0.04202 | 1  | Guanine nucleotide binding protein (G protein), gamma 11                                  |
| HDGF2     | 0.04202 | 1  | Hepatoma-derived growth factor-related protein 2                                          |
| HLTF      | 0.04202 | -1 | Helicase-like transcription factor                                                        |
| IGJ       | 0.04202 | -1 | Immunoglobulin J polypeptide, linker protein for immunoglobulin alpha and mu polypeptides |

|           |         |    |                                                                        |
|-----------|---------|----|------------------------------------------------------------------------|
| IL4R      | 0.04202 | -1 | Interleukin 4 receptor                                                 |
| LILRB1    | 0.04202 | -1 | Leukocyte immunoglobulin-like receptor, subfamily B, member 1          |
| LOC283874 | 0.04202 | -1 | Hypothetical protein LOC283874                                         |
| LPIN1     | 0.04202 | -1 | Lipin 1                                                                |
| MRPL18    | 0.04202 | 1  | Mitochondrial ribosomal protein L18                                    |
| NR4A1     | 0.04202 | -1 | Nuclear receptor subfamily 4, group A, member 1                        |
| PLEKHA9   | 0.04202 | -1 | Pleckstrin homology domain containing, family A member 9               |
| PPP1R16B  | 0.04202 | -1 | Protein phosphatase 1, regulatory subunit 16B                          |
| RELB      | 0.04202 | -1 | v-rel reticuloendotheliosis viral oncogene homolog B                   |
| REM1      | 0.04202 | -1 | RAS -like GTP-binding 1                                                |
| RUNX1     | 0.04202 | -1 | Runt-related transcription factor 1                                    |
| SALL4     | 0.04202 | -1 | Sal-like 4                                                             |
| SGK1      | 0.04202 | 1  | Serum/glucocorticoid regulated kinase 1                                |
| SLC25A22  | 0.04202 | -1 | Solute carrier family 25, member 22                                    |
| TMEM106B  | 0.04202 | 1  | Transmembrane protein 106B                                             |
| TTC32     | 0.04202 | -1 | Tetratricopeptide repeat domain 32                                     |
| UTP6      | 0.04202 | -1 | UTP6, small subunit (SSU) processome component                         |
| ZNF841    | 0.04202 | -1 | Zinc finger protein 841                                                |
| AKNA      | 0.04478 | -1 | AT-hook transcription factor                                           |
| ANXA2     | 0.04478 | -1 | Annexin A2                                                             |
| C5orf39   | 0.04478 | -1 | Chromosome 5 open reading frame 39                                     |
| CCNL1     | 0.04478 | -1 | Cyclin L1                                                              |
| EIF4E     | 0.04478 | 1  | Eukaryotic translation initiation factor 4E                            |
| GOLPH4    | 0.04478 | -1 | Golgi phosphoprotein 4                                                 |
| GPSM3     | 0.04478 | -1 | G-protein signaling modulator 3                                        |
| ID3       | 0.04478 | -1 | Inhibitor of DNA binding 3, dominant negative helix-loop-helix protein |
| LOC399940 | 0.04478 | 1  | Tripartite motif-containing-like                                       |
| LOC728855 | 0.04478 | -1 | Hypothetical LOC728855                                                 |
| LOC88523  | 0.04478 | -1 | CG016                                                                  |
| OMA1      | 0.04478 | -1 | OMA1 homolog, zinc metallopeptidase                                    |
| PIB5PA    | 0.04478 | -1 | Phosphatidylinositol (4,5) bisphosphate 5-phosphatase, A               |
| PITX2     | 0.04478 | -1 | Paired-like homeodomain 2                                              |
| RIPK3     | 0.04478 | -1 | Receptor-interacting serine-threonine kinase 3                         |
| RPL39L    | 0.04478 | 1  | Ribosomal protein L39-like                                             |
| SASH3     | 0.04478 | -1 | SAM and SH3 domain containing 3                                        |
| SNCA      | 0.04478 | 1  | Synuclein, alpha                                                       |

|                |         |    |                                                                    |
|----------------|---------|----|--------------------------------------------------------------------|
| SYDE1          | 0.04478 | -1 | Synapse defective 1, Rho GTPase, homolog 1                         |
| TPD52          | 0.04478 | -1 | Tumor protein D52                                                  |
| TTC31          | 0.04478 | -1 | Tetratricopeptide repeat domain 31                                 |
| TRAPPC2        | 0.04563 | -1 | Trafficking protein particle complex 2                             |
| C11orf41       | 0.04703 | 1  | Chromosome 11 open reading frame 41                                |
| LMNA           | 0.04703 | -1 | Lamin A/C                                                          |
| MC1R           | 0.04703 | 1  | Melanocortin 1 receptor                                            |
| ZDHHHC13       | 0.04703 | -1 | Zinc finger, DHHC-type containing 13                               |
| AUTS2          | 0.04768 | 1  | Autism susceptibility candidate 2                                  |
| CACYBP         | 0.04768 | 1  | Calcyclin binding protein                                          |
| DKFZp686I15217 | 0.04768 | -1 | DKFZp686I15217 protein                                             |
| EOMES          | 0.04768 | -1 | Eomesodermin homolog                                               |
| EP400          | 0.04768 | -1 | E1A binding protein p400                                           |
| EPHB6          | 0.04768 | -1 | EPH receptor B6                                                    |
| FYB            | 0.04768 | -1 | FYN binding protein (FYB-120/130)                                  |
| LAPTM4B        | 0.04768 | 1  | Lysosomal protein transmembrane 4 beta                             |
| MACROD1        | 0.04768 | 1  | MACRO domain containing 1                                          |
| MYO7A          | 0.04768 | -1 | Myosin VIIA                                                        |
| NEDD8          | 0.04768 | 1  | Neural precursor cell expressed, developmentally down-regulated 8  |
| PITPNC1        | 0.04768 | -1 | Phosphatidylinositol transfer protein, cytoplasmic 1               |
| RASGRP3        | 0.04768 | -1 | RAS guanyl releasing protein 3                                     |
| SCARA3         | 0.04768 | -1 | Scavenger receptor class A, member 3                               |
| SERINC3        | 0.04768 | 1  | Serine incorporator 3                                              |
| SS18L1         | 0.04768 | 1  | Synovial sarcoma translocation gene on chromosome 18-like 1        |
| TRPM7          | 0.04768 | 1  | Transient receptor potential cation channel, subfamily M, member 7 |
| VHL            | 0.04768 | -1 | von Hippel-Lindau tumor suppressor                                 |
| VPS37D         | 0.04768 | 1  | Vacuolar protein sorting 37 homolog D                              |
| CD247          | 0.04995 | -1 | CD247 molecule                                                     |
