# Supplementary material
Source: PubMed Central journal article supplement (PMC4397107)
Supplement: NIHMS634694-supplement-9.pdf [file NIHMS634694-supplement-9.pdf]

**Supplementary Table 3.** Multivariable Cox proportional hazards analysis of PLEKHA5 and other clinical variables

| <b>Variable</b>              | <b>Hazard Ratio (95% Confidence Interval)</b> | <b><i>P</i></b> |
|------------------------------|-----------------------------------------------|-----------------|
| PLEKHA5 (high vs. low)       | 1.593 (1.0893-2.402)                          | 0.015           |
| Age (>45y vs. younger)       | 0.974 (0.615-1.648)                           | 0.918           |
| Gender (male vs. female)     | 0.927 (0.626-1.339)                           | 0.695           |
| LDH (>245 vs. lower)         | 0.671 (0.448-1.019)                           | 0.061           |
| AJCC M stage (A vs. B vs. C) | 2.111 (1.135-4.376)                           | 0.040           |
